# Supplementary material
Source: PubMed Central journal article supplement (PMC2818918)
Supplement: 0909982107_pnas.0909982107_SI.pdf [file 0909982107_pnas.0909982107_SI.pdf]

# Supporting Information

Morita et al. 10.1073/pnas.0909982107

SI Text

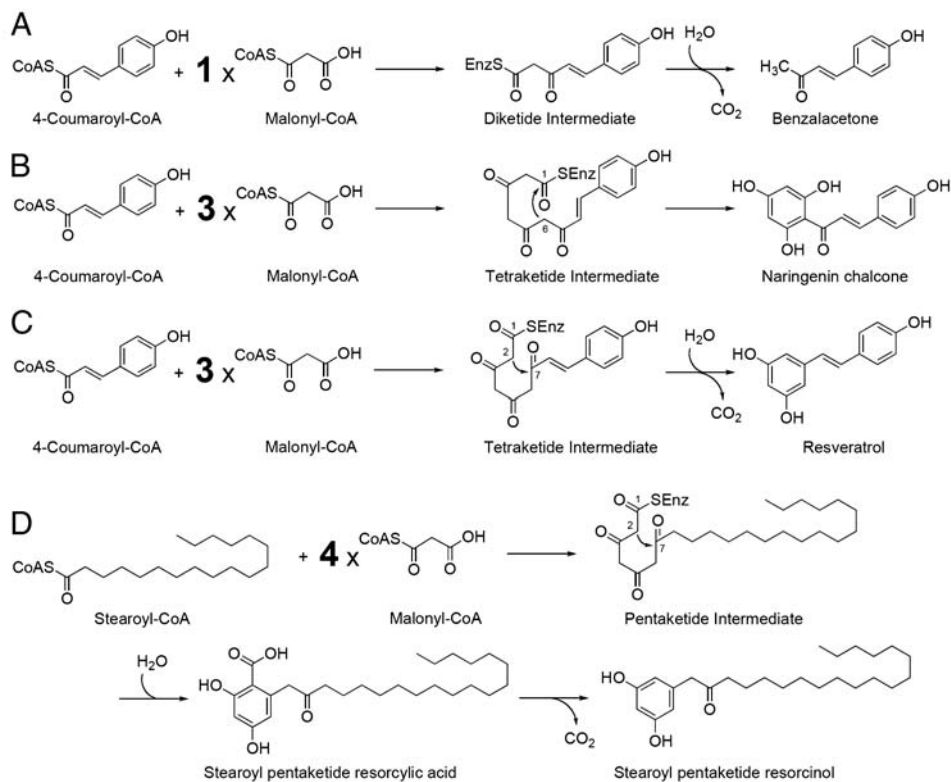

**Fig. S1.** Proposed synthetic mechanisms of polyketide. **(A)** benzalacetone from 4-coumaroyl-CoA and one molecule of malonyl-CoA by BAS; **(B)** naringenin chalcone from 4-coumaroyl-CoA and three molecules of malonyl-CoA by CHS; **(C)** resveratrol from and three molecules of malonyl-CoA by STS; and, **(D)** stearoyl pentaketide resorcylic acid and resorcinol from stearoyl-CoA and four molecules of malonyl-CoA by ORAS.

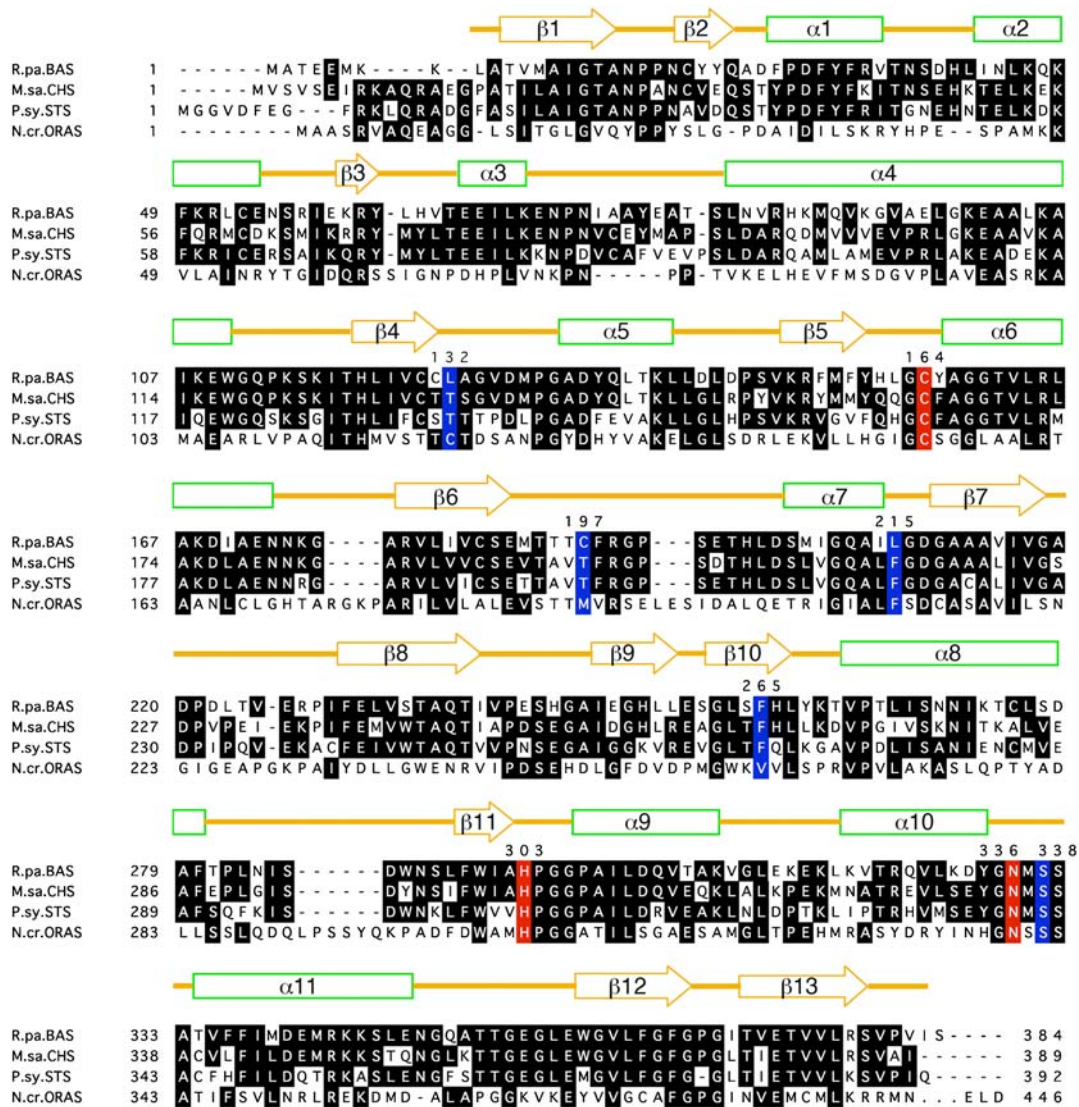

**Fig. S2.** Comparison of the primary sequence of BAS and other type III PKs. The secondary structures of BAS are also delineated:  $\alpha$ -helices (green rectangles);  $\beta$ -strands (orange arrows); and loops (orange, bold lines), which are diagrammed. The catalytic triad Cys-His-Asn residues are highlighted in red. The residues thought to be crucial for the functional diversity of type III PKs are colored in blue. Abbreviations (GeneBank accession numbers): R.pa.BAS, *Rheum palmatum* BAS (AAK82824); M.sa.CHS, *M. sativa* CHS (P30074); Psy. STS, *Pinus sylvestris* STS (AAB24341).

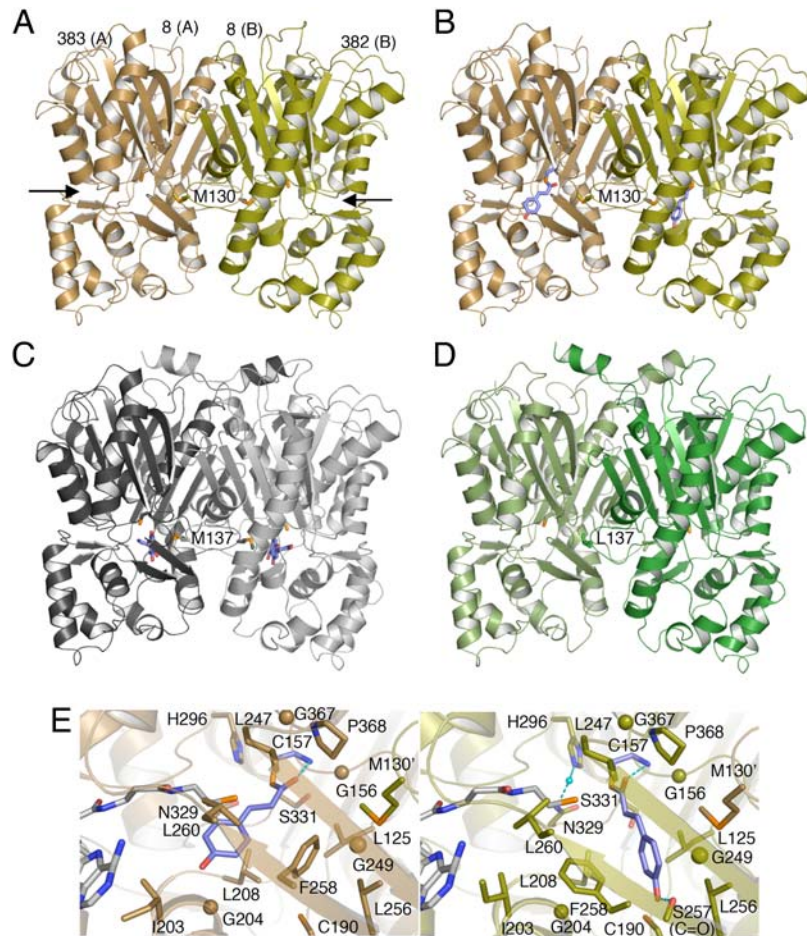

**Fig. 53.** Schematic representations of: (A) BAS\_apo structure; (B) BAS complexed with the monoketide intermediate (4-coumaroyl thioester); (C) *M. sativa* CHS complexed with naringenin (PDB entry 1CGK); and, (D) *P. sylvestris* STS (PDB entry 1U0U). Arrows indicate the substrate entrance in each monomer. The catalytic cysteine and methionine (or leucine), which form a partial wall of the active-site cavity of another monomer, are indicated in stick model. The bound monoketide intermediate in BAS and naringenin in *M. sativa* CHS are highlighted as blue stick model. (E) Comparison of the active-site in (*left*) monomer A and (*right*) monomer B of the BAS structure complexed with the monoketide intermediate. A CoA-SH molecule bound in the *M. sativa* CHS structure (PDB entry 1BQ6) was also shown as a gray stick model to indicate the CoA-binding tunnel.

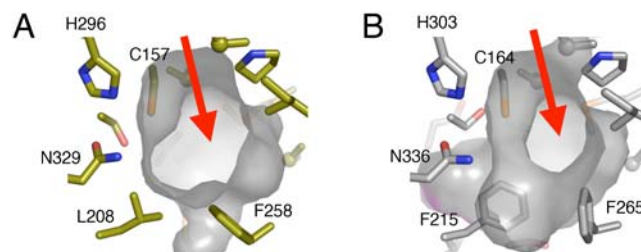

**Fig. 54.** Comparison of the active-site entrance of (A) BAS with that of (B) *M. sativa* CHS. Arrows indicate the substrate entrance in each monomer.



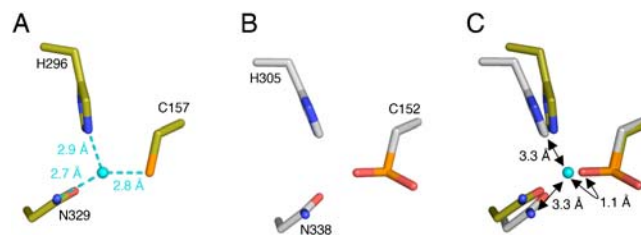

Fig. S7. Comparison of the catalytic triad of (A) *R. palmatum* BAS; and, (B) *N. crassa* ORAS. (C) Superimposition of the catalytic triad.

Table S1. Data collection and refinement statistics

| Data collection                                     | BAS                  | BAS + intermediate   | I207L/L208F          |
|-----------------------------------------------------|----------------------|----------------------|----------------------|
| Space group                                         | $P2_1$               | $P2_1$               | $P2_1$               |
| Unit-cell                                           |                      |                      |                      |
| $a, b, c$ (Å)                                       | 54.6, 89.6, 81.1     | 54.6, 89.9, 81.0     | 74.1, 89.2, 70.8     |
| $\alpha, \beta, \gamma$ (°)                         | 90.0, 100.5, 90.0    | 90.0, 100.5, 90.0    | 90.0, 95.7, 90.0     |
| Resolution (Å)                                      | 30.0–1.8 (1.86–1.80) | 30.0–1.6 (1.66–1.60) | 30.0–1.8 (1.86–1.80) |
| Unique reflections                                  | 69,782               | 100,844              | 74,255               |
| Redundancy                                          | 3.8 (3.8)            | 3.7 (3.6)            | 3.7 (3.5)            |
| Completeness (%)                                    | 98.3 (97.3)          | 99.8 (99.3)          | 100 (99.9)           |
| $\langle I/(\sigma I) \rangle$                      | 25.4 (7.5)           | 32.1 (8.3)           | 19.7 (4.4)           |
| $R_{\text{sym}}$ (%) <sup>*</sup>                   | 9.6 (26.7)           | 7.1 (22.9)           | 7.3 (27.5)           |
| Refinement                                          |                      |                      |                      |
| Resolution (Å)                                      | 1.8                  | 1.6                  | 1.8                  |
| $R_{\text{cryst}}/R_{\text{free}}$ (%) <sup>†</sup> | 18.4/20.6            | 19.5/21.5            | 18.4/20.4            |
| Number atoms                                        |                      |                      |                      |
| Protein                                             | 5,796                | 5,796                | 5,802                |
| Water                                               | 459                  | 554                  | 456                  |
| Ligand                                              | -                    | 22                   | -                    |
| $B$ -factors (Å <sup>2</sup> )                      |                      |                      |                      |
| Protein                                             | 12.8                 | 13.0                 | 12.9                 |
| Water                                               | 17.2                 | 19.6                 | 17.4                 |
| Ligand                                              | -                    | 21.4                 | -                    |
| r.m.s deviations                                    |                      |                      |                      |
| Bond lengths (Å)                                    | 0.005                | 0.011                | 0.005                |
| Bond angles (°)                                     | 1.2                  | 1.5                  | 1.2                  |

Values in parentheses are for the highest resolution shell.

<sup>\*</sup> $R_{\text{sym}} = \sum_h S_h |I(h)_i - \langle I(h) \rangle| / \sum_h S_h I(h)_i$ , where  $I(h)$  is the intensity of reflection  $h$ ,  $S_h$  is the sum over all reflections and  $S_i$  is the sum over  $i$  measurements of reflection  $h$ .

<sup>†</sup> $R_{\text{free}}$  was calculated with 5% of data excluded from refinement.
